# Supplementary material for: Association between metabolic profile and microbiomic changes in rats with functional dyspepsia
Source: Royal Society of Chemistry journal article supplement (doi:10.1039/c8ra01432a), 2018-01-01
Supplement: c8ra01432a1.pdf [file c8ra01432a1.pdf]

## Supplementary Information

Association between metabolic profile and microbiomic changes in rats with functional dyspepsia

Liang Luo<sup>#a</sup>, Minghua Hu<sup>#b</sup>, Yuan Li<sup>a</sup>, Yongxiong Chen<sup>a</sup>, Shaobao Zhang<sup>c</sup>, Jiahui Chen<sup>d</sup>,  
Yuanyuan Wang<sup>b</sup>, Biyu Lu<sup>a</sup>, Zhiyong Xie<sup>c</sup> and Qiongfeng Liao<sup>a\*</sup>

<sup>a</sup> School of Pharmaceutical Sciences, Guangzhou University of Chinese Medicine, Guangzhou, 510006, China

<sup>b</sup> Infinitus (China) Company Ltd, Guangzhou, 510623, China

<sup>c</sup> School of Pharmaceutical Sciences (Shenzhen), Sun Yat-sen University, Guangzhou, 510006, China

<sup>d</sup> Key Laboratory of State Administration of Traditional Chinese Medicine, Sunshine Lake Pharma Company Ltd, Dongguan, 523867, China

<sup>d</sup> Infinitus (China) Company Ltd, Guangzhou, 510623, China

\* Corresponding author:

Qiongfeng Liao, Tel. /Fax. +86 20 3958081, E-mail: liaoqf2075@yahoo.com;

# These authors contributed equally to this work.

## Supplementary information text:

### Materials and methods

#### NMR data processing

All  $^1\text{H}$  NMR spectra were recorded at 298 K, 600.13 MHz on Bruker AVIII 600 MHz spectrometer (Bruker Biospin, Germany). A one-dimensional pulse sequence [recycle delay-90°- $t_1$ -90°- $t_m$ -90°-acquisition] was used. The water signal was suppressed by irradiation during RD of 2 s, and mixing time ( $t_m$ ) of 80 ms. For each sample, the 90° pulse length was adjusted to approximately 10 ms and a total of 64 transients were accumulated into 32k data points over a spectral width of 20 ppm. The  $^1\text{H}$  NMR spectra were manually adjusted phase and corrected baseline using TOPSPIN (V2.1, Bruker Biospin) and referenced to the TSP resonance at  $\delta$  0.00. The spectral region ( $\delta$  0.50-9.50) was bucked with an equal spectra width of 0.004 ppm widths using AMIX software (V2.1, Bruker Biospin, Germany).

#### Data processing and statistical analysis

SIMCA-P+ (version 13.0, Umetrics, Sweden) and SPSS (V21.0, Chicago, USA) were used for statistical analyses. Data was presented as the means  $\pm$  standard deviation and were processed using a two-tailed unpaired t-test with the critical  $P$  value set as 0.05.

The reliability of the constructed PCA, PLS-DA, OPLS-DA models was evaluated by the predicted variation  $Q^2$  and the explained variation  $R^2$ .  $R^2$  is defined as the proportion of variance in the data and  $Q^2$  is defined as the proportion of variance in the data predictable. In general,  $R^2$  and  $Q^2$  should be larger than 0.5 to ensure that the model was well established. To further ensuring the validity of all the models, the response permutation testing was performed.

To screen metabolites and DGGE bands with striking changes that contributed to the separations between FD group and control group, OPLS-DA models were then carried out using the NMR- or DGGE-data as the X-matrix and class information as the Y-matrix with Pareto scaling. The corresponding loadings plots were generated using a MATLAB (Version 8.0, The MathWorks Inc., USA).

#### Supplementary tables and figures:

Table S1.  $^1\text{H}$  chemical shifts for metabolites in feces on day 14

| Numbers | Metabolites               | $\delta^1\text{H}$ (ppm) and multiplicity                  |
|---------|---------------------------|------------------------------------------------------------|
| F1      | Isocaproate               | 0.877(d), 1.446(m), 1.483(d), 2.199(t)                     |
| F2      | Caproate                  | 1.298(m), 1.556(m), 2.189(t)                               |
| F3      | 3-Methyl-2-oxovalerate    | 0.899(t), 1.102(d), 1.670(m), 2.925(m)                     |
| F4      | Valerate                  | 0.899(t), 1.299(m), 2.177(d)                               |
| F5      | Butyrate                  | 0.899(t), 1.568(m), 2.150(t)                               |
| F6      | $\alpha$ -Ketoisocaproate | 0.920(s), 2.051(m), 2.615(d)                               |
| F7      | Isoleucine                | 0.948(t), 1.003(d), 1.248(m), 1.452(m), 1.989(m)           |
| F8      | Leucine                   | 0.950(d), 0.970(d), 1.692(m), 1.718(m), 1.729(m), 3.727(m) |
| F9      | Valine                    | 0.993(d), 1.049(d), 2.271(m), 3.616(d)                     |
| F10     | Propionate                | 1.061(t), 2.182(q)                                         |
| F11     | Methyl succinate          | 1.102(d), 2.129(d), 2.634(m)                               |
| F12     | $\alpha$ -Ketoisovalerate | 1.127(d), 3.021(m)                                         |
| F13     | N-Heptanoate              | 1.299(m)                                                   |

|     |                             |                                                                                   |
|-----|-----------------------------|-----------------------------------------------------------------------------------|
| F14 | Lactate                     | 1.334(d), 4.122(q)                                                                |
| F15 | Threonine                   | 1.335(d), 3.590(d), 4.258(m)                                                      |
| F16 | Alanine                     | 1.484(d), 3.781(m)                                                                |
| F17 | Glutarate                   | 1.775(ov), 2.180(t)                                                               |
| F18 | Acetate                     | 1.928(s)                                                                          |
| F19 | Glutamate                   | 2.064(m), 2.354(m), 3.738(m)                                                      |
| F20 | Methionine                  | 2.142(s), 2.209(m), 2.660(t), 3.865(m)                                            |
| F21 | Pyruvate                    | 2.373(s)                                                                          |
| F22 | Succinate                   | 2.409(s)                                                                          |
| F23 | Desaminotyrosine            | 2.829(t), 6.875(d), 7.196(d)                                                      |
| F24 | 3-Phenylpropionate          | 2.495(t), 2.889(d), 7.272(t), 7.333(d), 7.373(m)                                  |
| F25 | Aspartate                   | 2.697(dd), 2.831(dd), 3.906(dd)                                                   |
| F26 | Sarcosine                   | 2.704(s), 3.594(s)                                                                |
| F27 | Dimethylamine               | 2.721(s)                                                                          |
| F28 | Asparagine                  | 2.818(dd), 3.028(m), 3.957(dd)                                                    |
| F29 | Trimethylamine              | 2.883(s)                                                                          |
| F30 | Creatine                    | 3.020(s), 3.926(s)                                                                |
| F31 | Tyrosine                    | 3.053(d), 3.197(dd), 3.949(d), 6.903(dd)                                          |
| F32 | Malonate                    | 3.113(s)                                                                          |
| F33 | Phenylalanine               | 3.117(dd), 3.270(dd), 3.987(q), 7.323(d), 7.365(t), 7.418(m)                      |
| F34 | Ethanolamine                | 3.151(d), 3.805(d)                                                                |
| F35 | Histidine                   | 3.144(dd), 3.249(dd), 4.001(q), 7.093(s), 7.844(s)                                |
| F36 | Choline                     | 3.203(s), 3.520(m), 4.113(m)                                                      |
| F37 | $\beta$ -Glucose            | 3.243(t), 3.478(m), 3.497(m), 3.864(m), 3.926(s), 4.653(d)                        |
| F38 | $\alpha$ -Glucose           | 3.413(m), 3.542(m), 3.729(m), 3.740(m), 3.776(m), 3.869(m),<br>5.203(d)           |
| F39 | Taurine                     | 3.243(t), 3.435(t)                                                                |
| F40 | Methanol                    | 3.366(s)                                                                          |
| F41 | 3-Hydroxyphenylacetate      | 3.497(s), 6.795(m), 6.873(ov), 7.249(ov)                                          |
| F42 | $\beta$ -Arabinose          | 3.525(dd), 3.672(t), 3.837(dd), 3.945(m), 4.523(d)                                |
| F43 | $\alpha$ -Arabinose         | 3.855(d), 3.907(m), 3.993(t), 4.023(d), 5.241(d)                                  |
| F44 | Phenylacetate               | 3.542(s), 7.311(m), 7.375(m)                                                      |
| F45 | Glycine                     | 3.566(s)                                                                          |
| F46 | Serine                      | 3.828(dd), 3.949(dd), 3.981(dd)                                                   |
| F47 | Uracil                      | 5.807(d), 7.542(d)                                                                |
| F48 | Fumarate                    | 6.525(s)                                                                          |
| F49 | Urocanate                   | 7.317(d), 7.434(s), 7.911(s)                                                      |
| F50 | Imidazole                   | 7.325(s)                                                                          |
| F51 | Adenine                     | 8.195(s), 8.213(s)                                                                |
| F52 | Formate                     | 8.460(s)                                                                          |
| F53 | Tauro- $\beta$ -muricholate | 0.694(s), 1.039(s), 1.354(m), 1.410(m), 1.731(m), 2.215(m),<br>2.302(m), 3.574(m) |
| F54 | Methylamine                 | 2.608(s)                                                                          |
| F55 | Trpoptophan                 | 7.213(m), 7.291(m), 7.322(s), 7.544(m), 7.745(m)                                  |

|     |                                   |                              |
|-----|-----------------------------------|------------------------------|
| F56 | N-Acetylgroupcontained<br>glytrin | 2.038(s), 2.062(s)           |
| F57 | P-Hydroxyphenylacetate            | 3.450(s), 6.873(d), 7.184(d) |
| F58 | Hypoxanthine                      | 8.195(s), 8.215(s)           |
| F59 | Tauro-<br>chenodeoxycholate acid  | 0.667(s)                     |
| F60 | Xanthine                          | 7.911(s)                     |

Table S2. <sup>1</sup>H chemical shifts for metabolites in urine on day 14

| Numbers | Metabolites          | $\delta^1\text{H}$ (ppm) and multiplicity                                      |
|---------|----------------------|--------------------------------------------------------------------------------|
| U1      | Valine               | 3.619(d), 2.276(m), 1.042(d), 0.983(d)                                         |
| U2      | Lactate              | 4.111(m), 1.332(d)                                                             |
| U3      | Threonine            | 3.601(d), 4.261(m), 1.332(d)                                                   |
| U4      | Alanine              | 3.783(dd), 1.489(d)                                                            |
| U5      | Acetate              | 1.933(s)                                                                       |
| U6      | Nag C                | 2.042(s)                                                                       |
| U7      | Pyruvate             | 2.375(s)                                                                       |
| U8      | 2-Ketoglutarate      | 2.434(t), 3.013(t)                                                             |
| U9      | Succinate            | 2.418(s)                                                                       |
| U10     | Citrate              | 2.539(d), 2.714(d)                                                             |
| U11     | N, N-Dimethylglycine | 2.933(s), 3.682(s)                                                             |
| U12     | Choline              | 3.214(s), 3.535(m), 4.086(m)                                                   |
| U13     | PC                   | 3.223(s), 3.603(m), 4.171(m)                                                   |
| U14     | CPC                  | 3.241(s), 3.693(m), 4.328(m)                                                   |
| U15     | Taurine              | 3.271(t), 3.440(t)                                                             |
| U16     | $\alpha$ -Glucose    | 5.245(d), 3.54(dd), 3.733(dd), 3.423(dd), 3.841(dd)                            |
| U17     | $\beta$ -Glucose     | 4.443(d), 3.260(dd), 3.511(dd, m), 3.403(dd, m), 3.740(dd), 3.891(dd)          |
| U18     | Glycine              | 3.550(s)                                                                       |
| U19     | Urea                 | 5.790(brs)                                                                     |
| U20     | Fumarate             | 6.514(s)                                                                       |
| U21     | Formate              | 8.470(s), 3.710(m)                                                             |
| U22     | Sarcosine            | 2.762(s), 3.653(s)                                                             |
| U23     | Ethanolamine         | 3.141(t), 3.843(t)                                                             |
| U24     | Creatinine           | 3.050(s), 4.057(s)                                                             |
| U25     | Methylamine          | 2.620(s)                                                                       |
| U26     | 2-Hydroxyisobutyrate | 1.365(s)                                                                       |
| U27     | 3-Hydroxyisovalerate | 1.275(s), 2.377(s)                                                             |
| U28     | Methylmalonate       | 1.243(d), 3.170(q)                                                             |
| U29     | Succinimide          | 2.779(s), 5.286(s)                                                             |
| U30     | Allantoate           | 5.286(s)                                                                       |
| U31     | Sucrose              | 5.418(d), 3.559(dd), 3.738(dd), 3.472(dd), 3.852(m), 4.220(dd, m),<br>4.060(d) |
| U32     | Guanine              | 7.694(s)                                                                       |
| U33     | TMAO                 | 3.268(s)                                                                       |

|     |                                |                                                                      |
|-----|--------------------------------|----------------------------------------------------------------------|
| U34 | Malonate                       | 3.131(s)                                                             |
| U35 | Guanidoacetate                 | 3.801(s)                                                             |
| U36 | Allothreonine                  | 1.190(d), 4.263(m), 3.8400(d)                                        |
| U37 | Fucose                         | 1.249(d), 3.808(m), 5.190(d), 3.772(m)                               |
| U38 | Trigonelline                   | 9.123(s), 8.843(dd), 8.090(d)                                        |
| U39 | Pantothenate                   | 0.936(s), 0.901(s), 3.517(s), 3.402(s), 4.003(s), 2.438(t), 3.450(t) |
| U40 | Dimethylamine                  | 2.721(s)                                                             |
| U41 | Allantoin                      | 5.388(s)                                                             |
| U42 | Cis-Aconitate                  | 5.710(s, m), 3.120(s, d)                                             |
| U43 | Hippurate                      | 7.56(dd), 7.644(t), 7.840(dd), 3.970(s), 8.548(brs)                  |
| U44 | Phenylacetylglycine            | 3.651(s), 7.420(m), 7.360(m), 7.360(m)                               |
| U45 | 4-CresolGlucuronide            | 2.300(s), 7.230(d), 7.060(d)                                         |
| U46 | Methylguanidine                | 2.828(s)                                                             |
| U47 | Acetamide                      | 1.995(s)                                                             |
| U48 | Tryptamine                     | 7.691(dd), 7.200(td), 7.510(d), 7.280(td)                            |
| U49 | Pseudouridine                  | 7.689(s), 4.682(d), 4.292(dd), 4.162(dd)                             |
| U50 | Indole-3-Acetate               | 7.500(d)                                                             |
| U51 | Niacinamide                    | 7.420(m), 8.957(d)                                                   |
| U52 | Histidines                     | 3.160(dd), 3.280(t), 3.970(d), 7.080(s), 7.920(s)                    |
| U53 | P-Hydroxybenzoate              | 6.970(m), 7.770(m)                                                   |
| U54 | Phenylalanine                  | 3.120(dd), 3.260(d), 7.330(m), 7.350(m), 7.400(m)                    |
| U55 | P-Hydroxyphenylacetate         | 3.460(s), 6.871(m), 7.163(m)                                         |
| U56 | P-Cresol                       | 2.260(s), 6.840(d), 7.163(d)                                         |
| U57 | Triglycerides                  | 0.892(m), 1.301(m), 2.043(m), 2.242(m), 2.753(m), 5.330(m)           |
| U58 | Proline                        | 2.032(m), 2.343(m), 3.384(m), 3.401(m), 4.140(d)                     |
| U59 | Creatine                       | 3.024(s), 3.940(s)                                                   |
| U60 | Guanidinoacetate               | 3.801(s)                                                             |
| U61 | Leucine                        | 0.920(d), 0.925(s), 1.724(m), 3.734(d)                               |
| U62 | Glutamate                      | 2.037(m), 2.338(m), 3.764(dd)                                        |
| U63 | N6, N6, N6-<br>Trimethyllysine | 3.110(s)                                                             |
| U64 | Lysine                         | 1.480(dd), 1.710(d), 1.830(m), 3.010(t)                              |
| U65 | Trimethylamine (TMA)           | 2.892(s)                                                             |
| U66 | Ketoleucine                    | 0.940(d), 2.098(m), 2.618(d)                                         |
| U67 | N-Acetylglycoproteins          | 2.046(s)                                                             |
| U68 | 3-Methyl-2-Oxovalerate         | 0.888(t), 1.100(d), 1.424(m), 1.664(m), 2.917(m)                     |
| U69 | Isobutyrate                    | 1.053(d), 2.384(m)                                                   |
| U70 | Isopropanol                    | 1.143(d), 4.027(m)                                                   |
| U71 | N-acetyl glycine               | 2.039(s), 3.761(d)                                                   |
| U72 | Glutamine                      | 2.135(m), 2.443(m), 3.798(t)                                         |
| U73 | Acetylcarnitine                | 2.159(s), 2.502(m), 2.636(m), 3.201(s), 3.622(d), 3.829(dd)          |

Table S3 Model validation parameters on day 14

| Sample | PCA              |                | PLS-DA           |                |                | OPLS-DA          |                |          |
|--------|------------------|----------------|------------------|----------------|----------------|------------------|----------------|----------|
|        | R <sup>2</sup> X | Q <sup>2</sup> | R <sup>2</sup> X | Q <sup>2</sup> | <i>P</i> -test | R <sup>2</sup> X | Q <sup>2</sup> | <i>P</i> |
| Feces  | 0.873            | 0.602          | 0.733            | 0.979          | √              | 0.705            | 0.914          | 0.0011   |
| Urine  | 0.852            | 0.686          | 0.789            | 0.992          | √              | 0.789            | 0.993          | <0.0001  |

*P* test: permutation test, “√”: model validation passed; *P* value: CV-ANOVA analysis results.

Table S4. Result of pathway analysis for urine on day 14

| Pathway                                     | Total | Expected | Hits | <i>P</i> value | Holm adjust | FDR    | Impact |
|---------------------------------------------|-------|----------|------|----------------|-------------|--------|--------|
| Citrate cycle (TCA cycle)                   | 20    | 0.3994   | 4    | 0.0005         | 0.0402      | 0.0402 | 0.1741 |
| Alanine, aspartate and glutamate metabolism | 24    | 0.4793   | 4    | 0.0010         | 0.0823      | 0.0417 | 0.2162 |
| D-Glutamine and D-glutamate metabolism      | 5     | 0.0999   | 2    | 0.0037         | 0.2929      | 0.1001 | 0      |
| Glyoxylate and dicarboxylate metabolism     | 16    | 0.3195   | 2    | 0.0388         | 1           | 0.7865 | 0.4074 |
| Butanoate metabolism                        | 20    | 0.3994   | 2    | 0.0586         | 1           | 0.9487 | 0      |
| Biotin metabolism                           | 5     | 0.0999   | 1    | 0.0961         | 1           | 1      | 0      |
| Taurine and hypotaurine metabolism          | 8     | 0.1598   | 1    | 0.1494         | 1           | 1      | 0.4286 |
| Purine metabolism                           | 68    | 1.3581   | 3    | 0.1509         | 1           | 1      | 0.0104 |
| Methane metabolism                          | 9     | 0.1797   | 1    | 0.1665         | 1           | 1      | 0      |
| Nitrogen metabolism                         | 9     | 0.1797   | 1    | 0.1665         | 1           | 1      | 0      |
| Tyrosine metabolism                         | 42    | 0.8388   | 2    | 0.2036         | 1           | 1      | 0      |
| Arginine and proline metabolism             | 44    | 0.8787   | 2    | 0.2184         | 1           | 1      | 0      |
| Nicotinate and nicotinamide metabolism      | 13    | 0.2596   | 1    | 0.2316         | 1           | 1      | 0.2381 |
| Pantothenate and CoA biosynthesis           | 15    | 0.2996   | 1    | 0.2622         | 1           | 1      | 0.0204 |
| Propanoate metabolism                       | 20    | 0.3994   | 1    | 0.3339         | 1           | 1      | 0      |
| Aminoacyl-tRNA biosynthesis                 | 67    | 1.3381   | 2    | 0.3906         | 1           | 1      | 0      |
| Valine, leucine and isoleucine degradation  | 38    | 0.7589   | 1    | 0.5402         | 1           | 1      | 0      |
| Pyrimidine metabolism                       | 41    | 0.8188   | 1    | 0.5680         | 1           | 1      | 0      |
| Tryptophan metabolism                       | 41    | 0.8188   | 1    | 0.5680         | 1           | 1      | 0      |
| Primary bile acid biosynthesis              | 46    | 0.9187   | 1    | 0.6107         | 1.          | 1      | 0.0298 |

Table S5. Result of pathway analysis for feces on day 14

| Pathway                                     | Total | Expected | Hits | <i>P</i> value | Holm adjust | FDR    | Impact |
|---------------------------------------------|-------|----------|------|----------------|-------------|--------|--------|
| Methane metabolism                          | 9     | 0.1091   | 2    | 0.0047         | 0.3841      | 0.3841 | 0      |
| Aminoacyl-tRNA biosynthesis                 | 67    | 0.8124   | 3    | 0.0439         | 1           | 0.8000 | 0      |
| Purine metabolism                           | 68    | 0.8245   | 3    | 0.0455         | 1           | 0.8000 | 0.0483 |
| Glycerophospholipid metabolism              | 30    | 0.3638   | 2    | 0.0493         | 1           | 0.8000 | 0.1389 |
| Glycine, serine and threonine metabolism    | 32    | 0.3880   | 2    | 0.0555         | 1           | 0.8000 | 0.2920 |
| Linoleic acid metabolism                    | 5     | 0.0606   | 1    | 0.0593         | 1           | 0.8000 | 0      |
| Cyanoamino acid metabolism                  | 6     | 0.0728   | 1    | 0.0707         | 1           | 0.8182 | 0      |
| $\alpha$ -Linolenic acid metabolism         | 9     | 0.1091   | 1    | 0.1043         | 1           | 0.9384 | 0      |
| Nitrogen metabolism                         | 9     | 0.1091   | 1    | 0.1043         | 1           | 0.9384 | 0      |
| Valine, leucine and isoleucine biosynthesis | 11    | 0.1334   | 1    | 0.1260         | 1           | 1      | 0.3333 |
| Pantothenate and CoA biosynthesis           | 15    | 0.1819   | 1    | 0.1680         | 1           | 1      | 0      |
| Pyruvate metabolism                         | 22    | 0.2668   | 1    | 0.2370         | 1           | 1      | 0.0558 |
| Glutathione metabolism                      | 26    | 0.3153   | 1    | 0.2739         | 1           | 1      | 0.0057 |
| Glycolysis or Gluconeogenesis               | 26    | 0.3153   | 1    | 0.2739         | 1           | 1      | 0.0286 |
| Porphyrin and chlorophyll metabolism        | 27    | 0.3274   | 1    | 0.2829         | 1           | 1      | 0      |
| Arachidonic acid metabolism                 | 36    | 0.4365   | 1    | 0.3591         | 1           | 1      | 0      |
| Valine, leucine and isoleucine degradation  | 38    | 0.4608   | 1    | 0.3749         | 1           | 1      | 0      |
| Primary bile acid biosynthesis              | 46    | 0.5578   | 1    | 0.4347         | 1           | 1      | 0.0298 |

Table S6 Result of metabolite set enrichment analysis for urine on day 14

| Pathway                                | Total | Expected | Hits | <i>P</i> value | Holm <i>P</i> | FDR  |
|----------------------------------------|-------|----------|------|----------------|---------------|------|
| Citric acid cycle (TCA cycle)          | 23    | 0.893    | 4    | 0.010          | 0.79          | 0.79 |
| Glutamate metabolism                   | 18    | 0.699    | 3    | 0.029          | 1             | 1    |
| Urea cycle                             | 20    | 0.777    | 3    | 0.039          | 1             | 1    |
| Mitochondrial electron transport chain | 15    | 0.583    | 2    | 0.112          | 1             | 1    |
| Biotin metabolism                      | 4     | 0.155    | 1    | 0.147          | 1             | 1    |
| Ammonia recycling                      | 18    | 0.699    | 2    | 0.152          | 1             | 1    |
| Protein biosynthesis                   | 19    | 0.738    | 2    | 0.166          | 1             | 1    |
| Alanine metabolism                     | 6     | 0.233    | 1    | 0.212          | 1             | 1    |
| Taurine and hypotaurine metabolism     | 7     | 0.272    | 1    | 0.243          | 1             | 1    |
| Malate-aspartate shuttle               | 8     | 0.311    | 1    | 0.273          | 1             | 1    |
| Pantothenate and Coa biosynthesis      | 10    | 0.388    | 1    | 0.329          | 1             | 1    |
| Ubiquinone biosynthesis                | 10    | 0.388    | 1    | 0.329          | 1             | 1    |
| Aspartate metabolism                   | 12    | 0.466    | 1    | 0.380          | 1             | 1    |
| Glucose-alanine cycle                  | 12    | 0.466    | 1    | 0.380          | 1             | 1    |
| $\beta$ -Alanine metabolism            | 13    | 0.505    | 1    | 0.405          | 1             | 1    |

|                                            |    |       |   |       |   |   |
|--------------------------------------------|----|-------|---|-------|---|---|
| Phenylalanine and tyrosine metabolism      | 13 | 0.505 | 1 | 0.405 | 1 | 1 |
| Lysine degradation                         | 13 | 0.505 | 1 | 0.405 | 1 | 1 |
| Nicotinate and nicotinamide metabolism     | 13 | 0.505 | 1 | 0.405 | 1 | 1 |
| Tyrosine metabolism                        | 38 | 1.480 | 2 | 0.441 | 1 | 1 |
| Propanoate metabolism                      | 18 | 0.699 | 1 | 0.514 | 1 | 1 |
| Purine metabolism                          | 45 | 1.750 | 2 | 0.532 | 1 | 1 |
| Arginine and proline metabolism            | 26 | 1.010 | 1 | 0.649 | 1 | 1 |
| Gluconeogenesis                            | 27 | 1.050 | 1 | 0.663 | 1 | 1 |
| Tryptophan metabolism                      | 34 | 1.320 | 1 | 0.747 | 1 | 1 |
| Valine, leucine and isoleucine degradation | 36 | 1.400 | 1 | 0.767 | 1 | 1 |
| Pyrimidine metabolism                      | 36 | 1.400 | 1 | 0.767 | 1 | 1 |
| Bile acid biosynthesis                     | 49 | 1.900 | 1 | 0.865 | 1 | 1 |

Table S7 Result of metabolite set enrichment analysis for feces on day 14

| Pathway                                    | Total | Expected | Hits | <i>P</i> value | Holm <i>P</i> | FDR |
|--------------------------------------------|-------|----------|------|----------------|---------------|-----|
| Protein biosynthesis                       | 19    | 0.438    | 2    | 0.068          | 1             | 1   |
| Purine metabolism                          | 45    | 1.040    | 3    | 0.080          | 1             | 1   |
| Glycine, serine and threonine metabolism   | 26    | 0.600    | 2    | 0.118          | 1             | 1   |
| Glutathione metabolism                     | 10    | 0.231    | 1    | 0.209          | 1             | 1   |
| Aspartate metabolism                       | 12    | 0.277    | 1    | 0.246          | 1             | 1   |
| Bile acid biosynthesis                     | 49    | 1.130    | 2    | 0.314          | 1             | 1   |
| Ammonia recycling                          | 18    | 0.415    | 1    | 0.346          | 1             | 1   |
| Propanoate metabolism                      | 18    | 0.415    | 1    | 0.346          | 1             | 1   |
| Phospholipid biosynthesis                  | 19    | 0.438    | 1    | 0.361          | 1             | 1   |
| Pyruvate metabolism                        | 20    | 0.461    | 1    | 0.376          | 1             | 1   |
| Porphyrin metabolism                       | 22    | 0.507    | 1    | 0.405          | 1             | 1   |
| Methionine metabolism                      | 24    | 0.553    | 1    | 0.433          | 1             | 1   |
| Valine, leucine and isoleucine degradation | 36    | 0.830    | 1    | 0.576          | 1             | 1   |



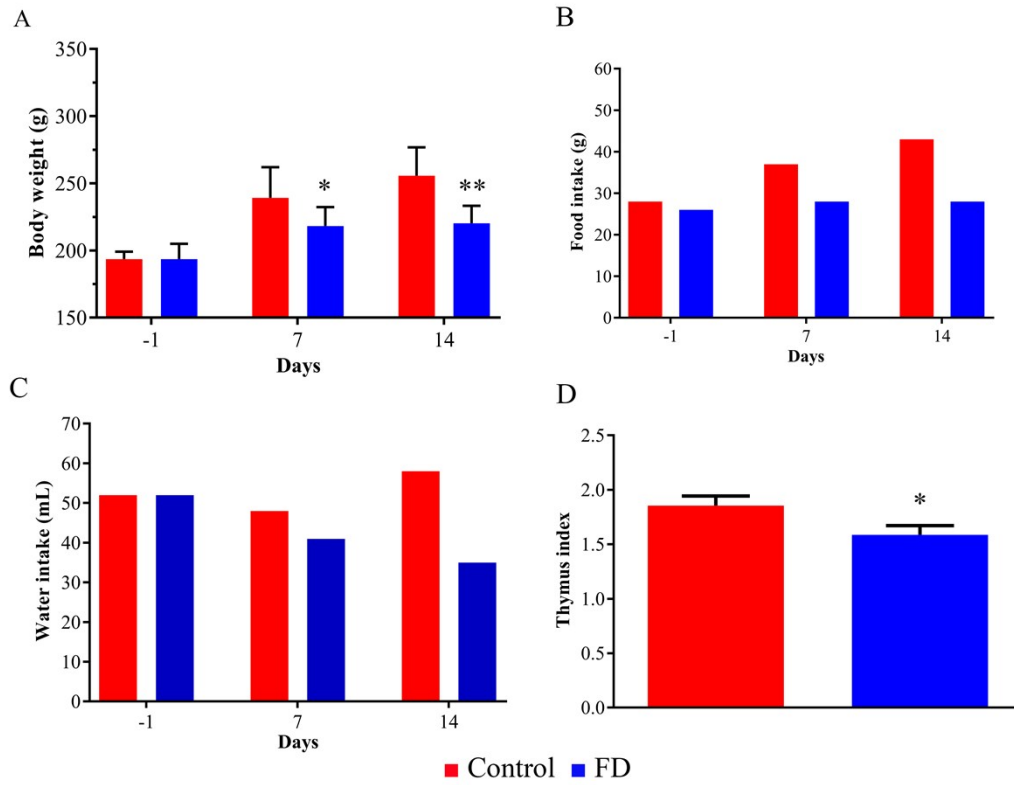

Fig. S1 The representative change of body weight (A), food intake (B), water intake (C) and thymus index (D) on day 14 in control and FD group. Value of body weight and thymus index were expressed as mean  $\pm$  S.D. (n = 14) \*:  $P < 0.05$ , \*\*:  $P < 0.01$ .

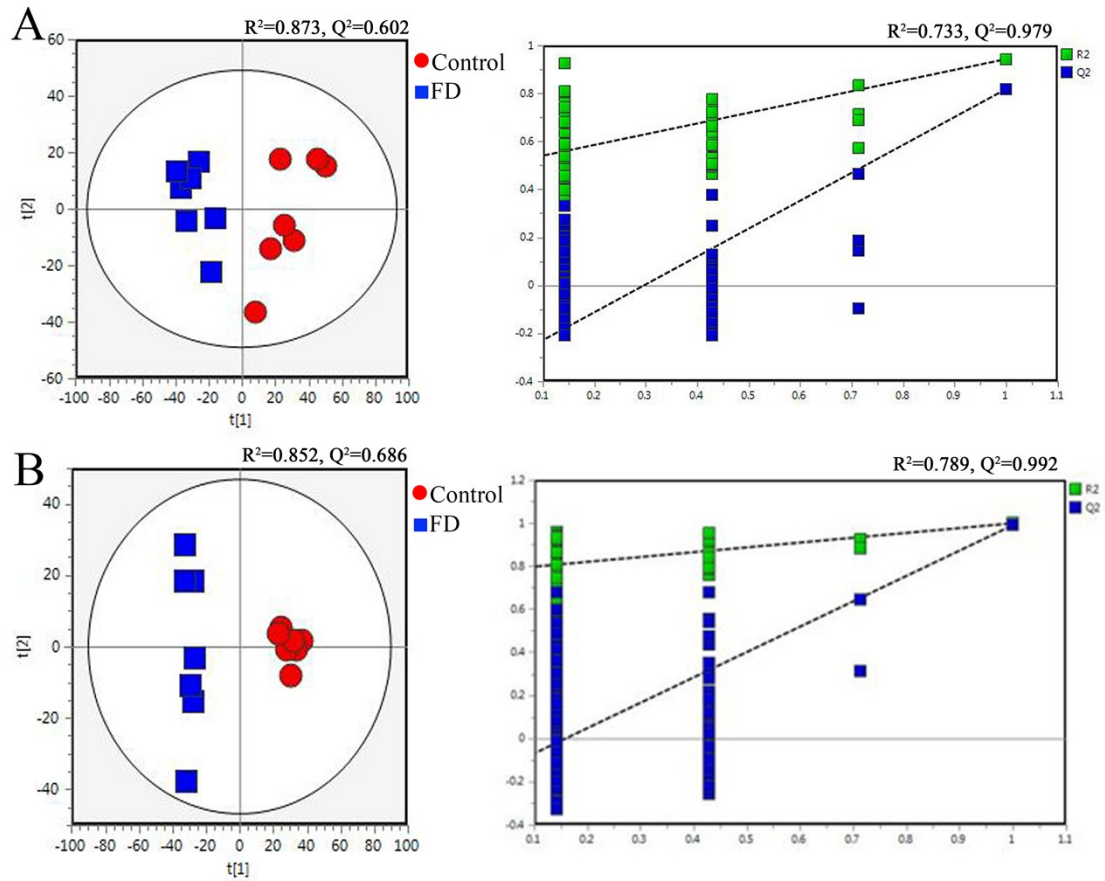

Fig. S2 PCA scores plots (left panel) and PLS-DA permutation test plots with 200 permutations (right panel) for  $^1\text{H}$  NMR data of feces (A) and urine (B) on day 14. (n=14)

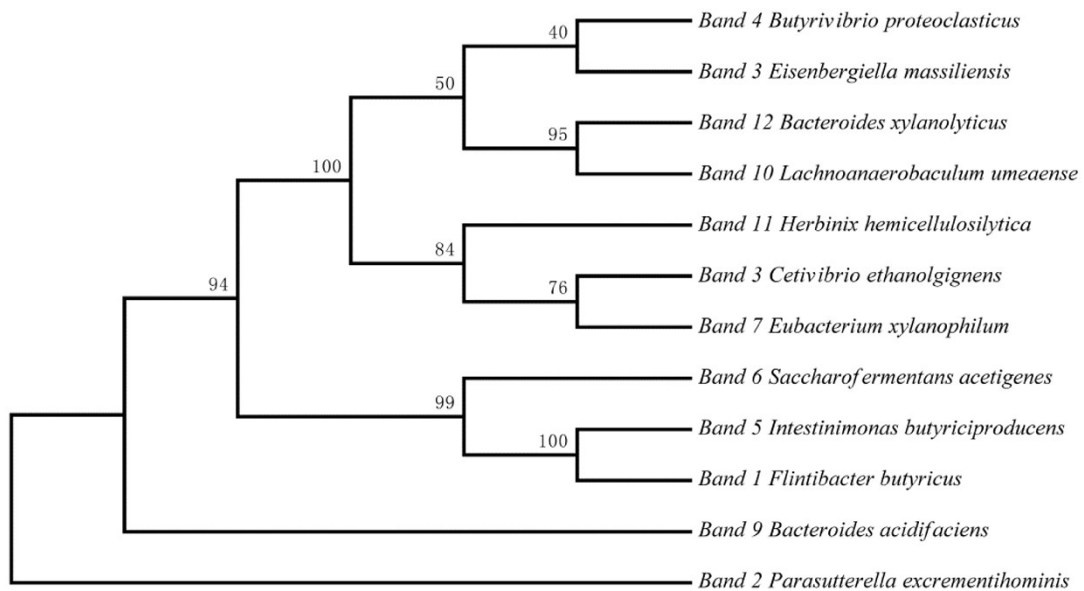

Fig. S3 Phylogenetic tree of 16s rRNA V3 region sequences derived from DGGE bands.
